# Supplementary material
Source: PubMed Central journal article supplement (PMC2529102)
Supplement: 0805944105_0805944105SI.pdf [file 0805944105_0805944105SI.pdf]

# Supporting Information

Mouysset *et al.* 10.1073/pnas.0805944105

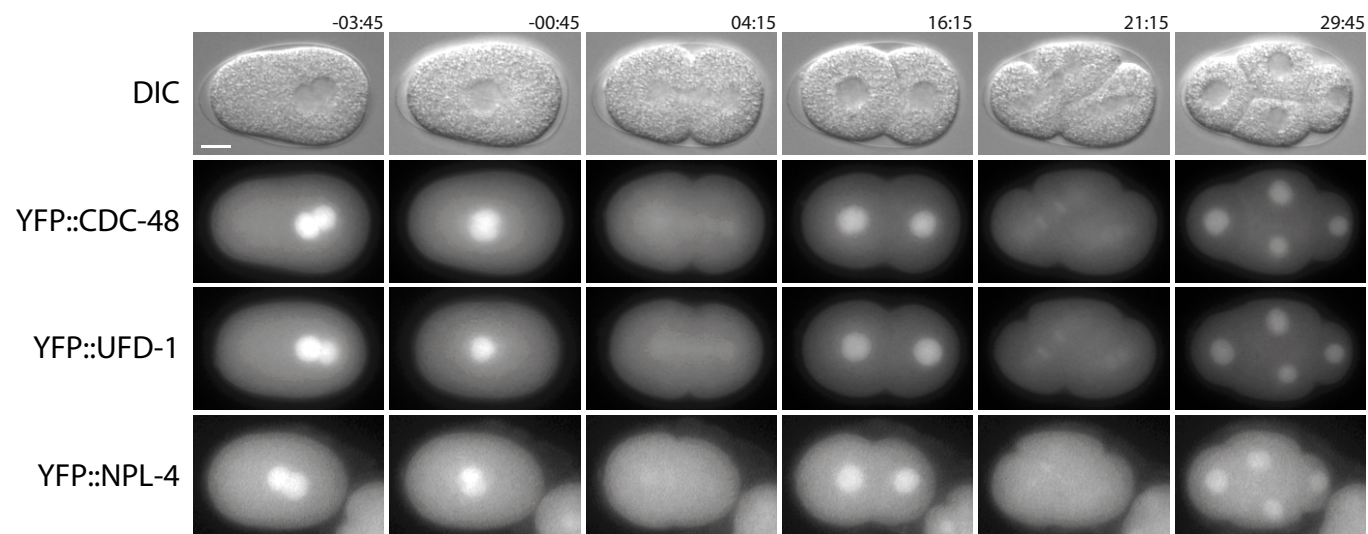

**Fig. S1.** CDC-48, UFD-1, and NPL-4 form a complex localized in the nucleus of early embryos. DIC and fluorescent images of transgenic wild-type embryos expressing YFP::CDC-48, YFP::UFD-1, and YFP::NPL-4. Representative DIC images correspond to YFP::CDC-48. (Scale bar, 10  $\mu$ m).

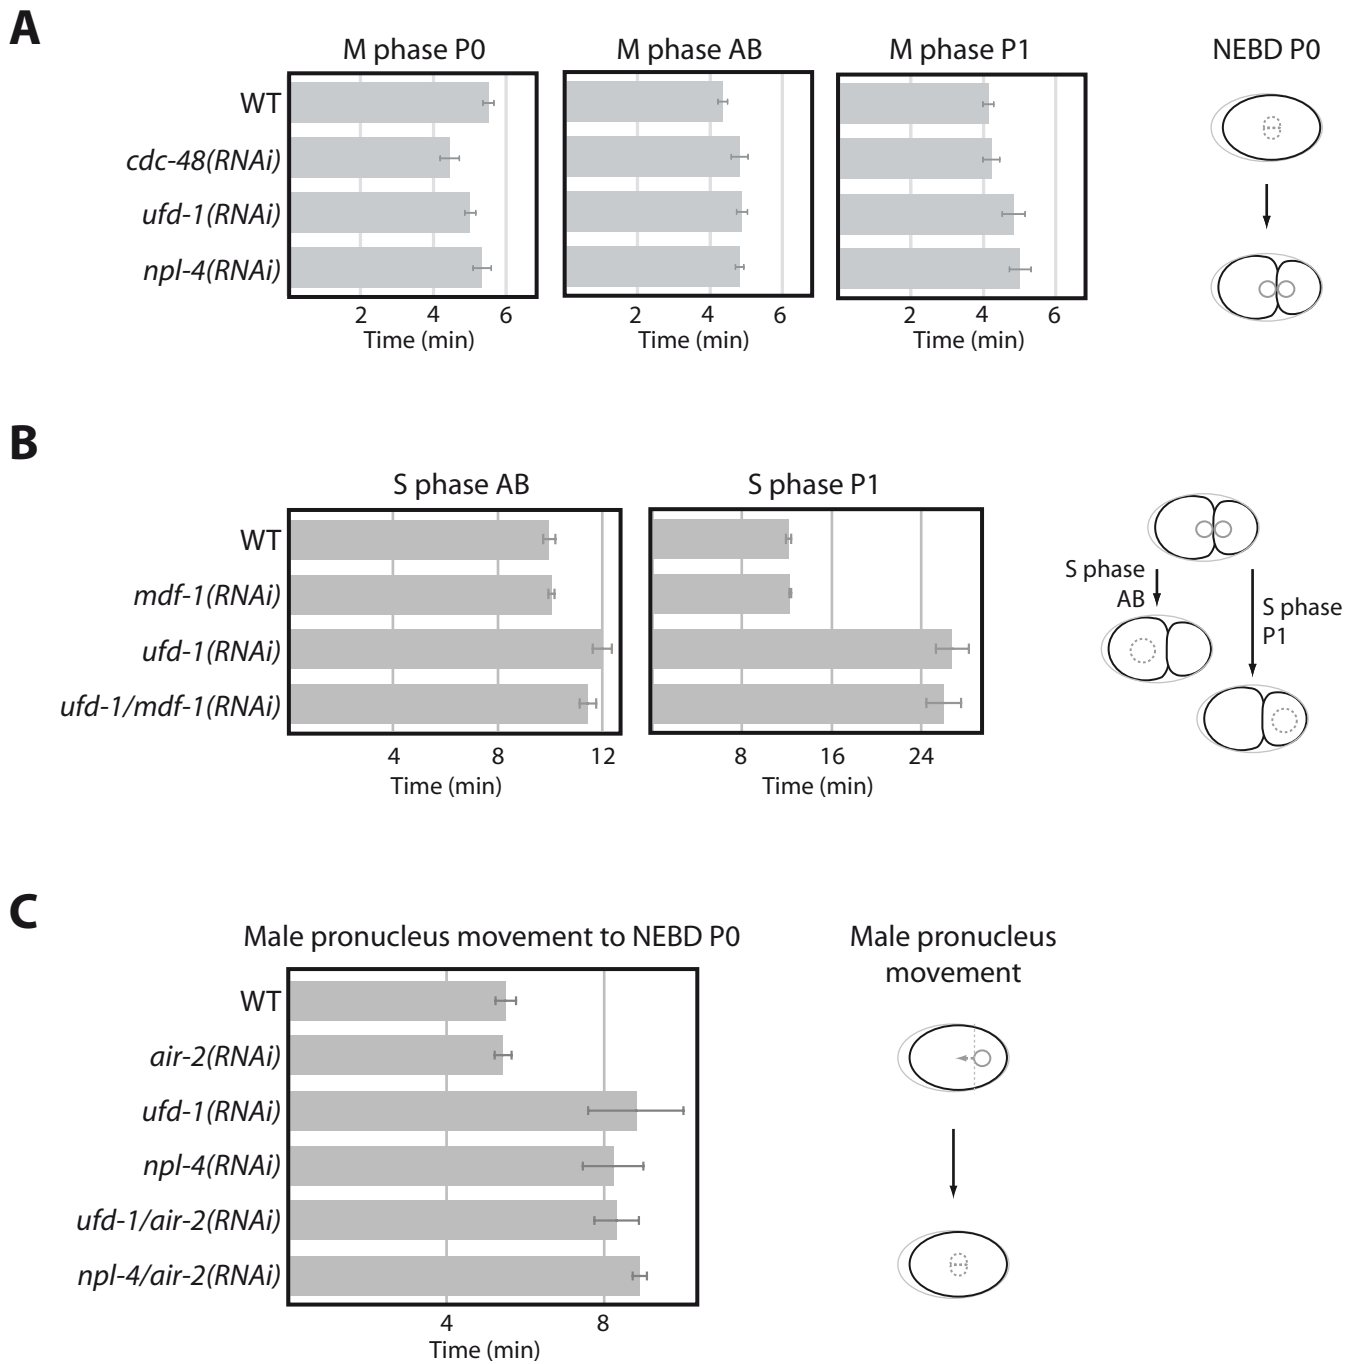

**Fig. S2.** Downregulation of  $CDC-48^{UFD-1/NPL-4}$  does not influence mitosis progression. (A) Quantification of mitosis time of P0, AB, and P1 cells in wild-type (WT) or the indicated RNAi embryos. Mitosis corresponds to the time between onset of NEBD and the end of cytokinesis (see cartoon at right). (B) Quantification of S phase duration in AB and P1 cells after downregulation of *mdf-1* and/or *ufd-1*. (C). Quantification of the time separating initiation of male pronucleus movement from the end of cytokinesis (see cartoon at right) for epistatic analysis of *air-2(RNAi)* with *ufd-1(RNAi)* or *npl-4(RNAi)*.

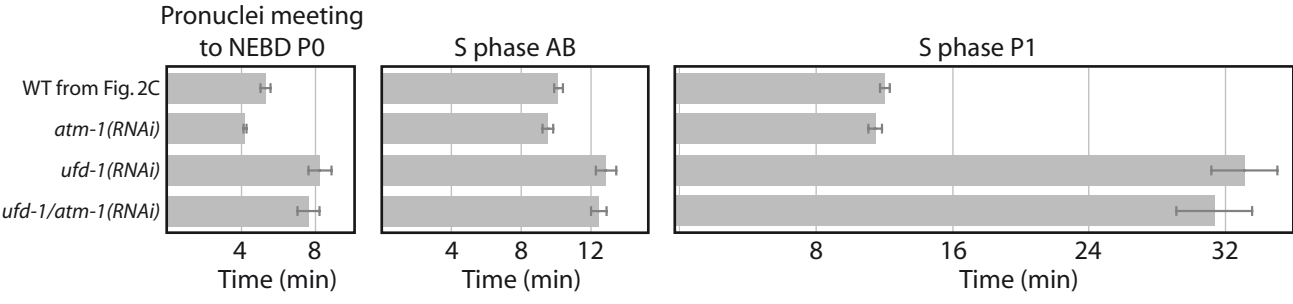

**Fig. S3.** Downregulation of ATM-1 does not suppress the S phase delay caused by UFD-1 depletion. Quantification of S phase duration in P0, AB, and P1 cells after downregulation of *atm-1* and/or *ufd-1*.

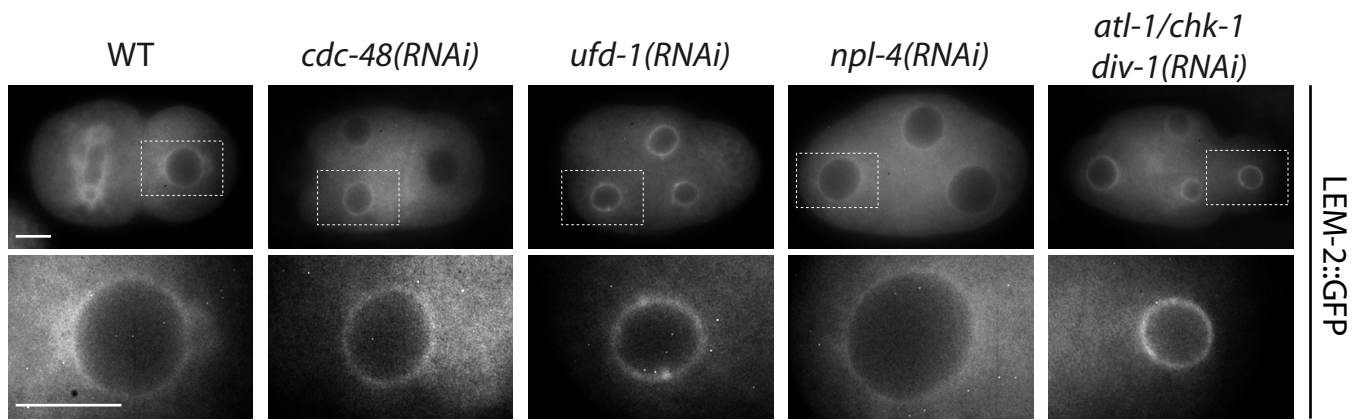

**Fig. S4.** Depletion of CDC-48<sup>UFD-1/NPL-4</sup> does not influence the nuclear envelope integrity. Fluorescent images of transgenic embryos expressing LEM-2::GFP in wild-type (WT) or the indicated RNAi embryos. (Scale bar, 10  $\mu$ m).

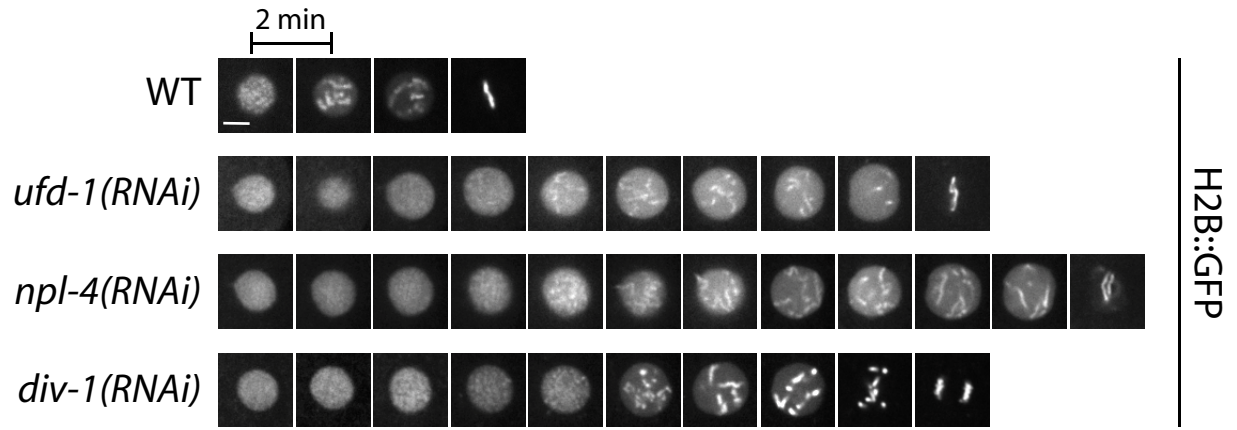

**Fig. S5.** Delayed chromatin condensation in embryos depleted for UFD-1, NPL-4, and DIV-1. Images of P1 cell nuclei of wild-type (WT), *ufd-1(RNAi)*, *npl-4(RNAi)*, and *div-1(RNAi)* embryos expressing H2B::GFP. Images were taken at two-minute intervals. The first image is taken 10 min after anaphase onset in P0 cells. (Scale bar, 5 μm).

Control

DIC

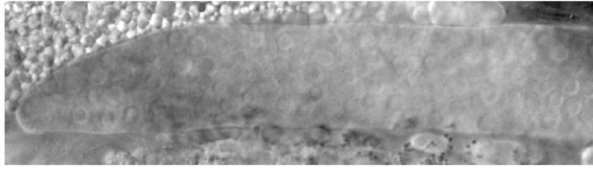

*npl-4(RNAi)*

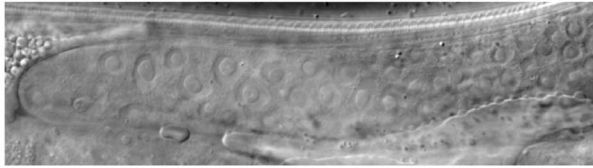

DAPI (blue)  
 $\alpha$ RAD-51 (red)

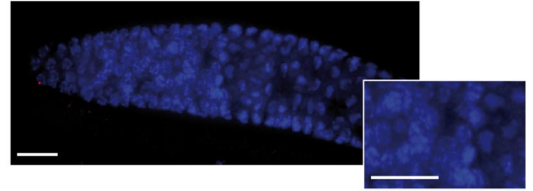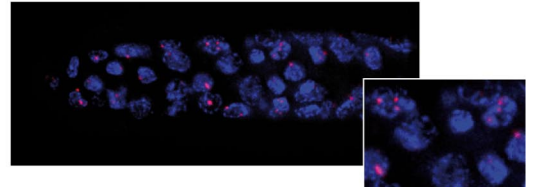

**Fig. S6.** Formation of RAD-51 foci in the germline of *npl-4(RNAi)* hermaphrodite worms. DIC and fluorescence images of gonads of *npl-4(RNAi)* worms. (Scale bar, 10  $\mu$ m).

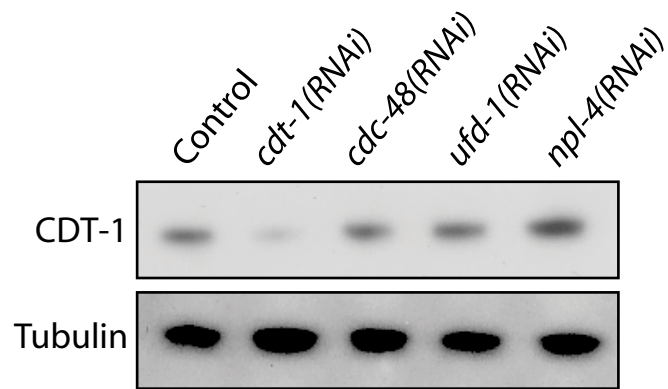

**Fig. S7.** Levels of CDT-1 are not regulated by the CDC-48<sup>UFD-1/NPL-4</sup> complex. Protein extracts of the indicated strains were analyzed by immunoblotting with CDT-1-specific antibodies. Tubulin was used as loading control.

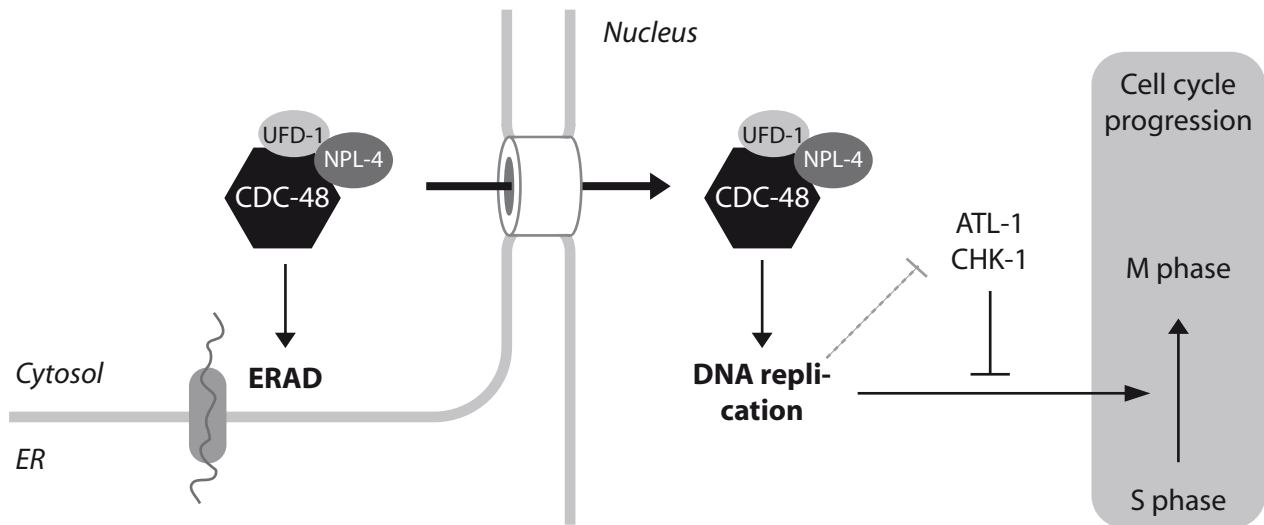

**Fig. S8.** Model for a role of CDC-48<sup>UFD-1/NPL-4</sup> in DNA replication. Independent of its well characterized function in ERAD, the CDC-48<sup>UFD-1/NPL-4</sup> complex shuttles into the nucleus at the end of M phase to regulate DNA replication. Consequently, replication defects in S phase caused by depletion of CDC-48<sup>UFD-1/NPL-4</sup> activate the checkpoint kinases ATL-1 and CHK-1 to arrest the cell cycle.



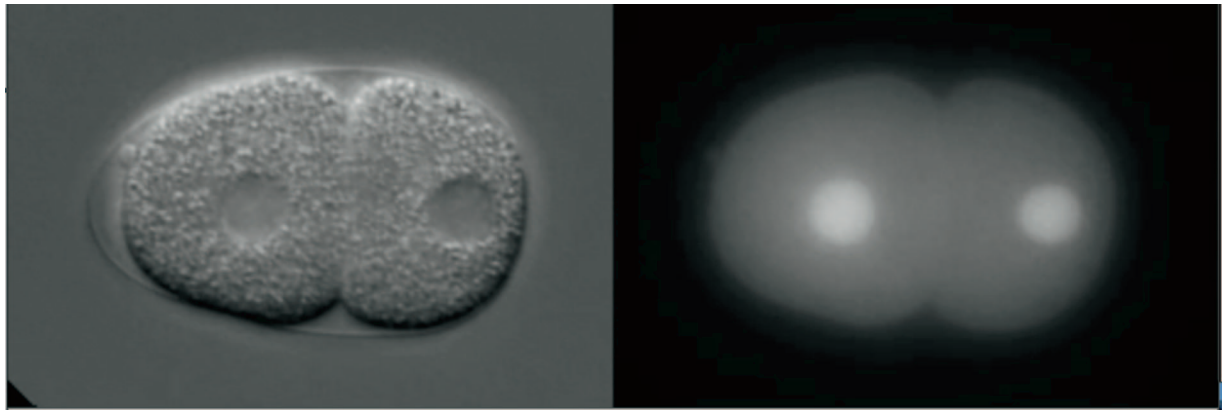

**Movie S1.** This movie corresponds to experiments shown in Fig. 1 A and Fig. S1 and illustrates the early division up to the four-cell stage of a *C. elegans* embryo expressing YFP::CDC-48 by DIC and fluorescence microscopy. The localization patterns of YFP::UFD-1 and YFP::NPL-4 are similar to YFP::CDC-48 (QuickTime, 2.4 MB).

[Movie S1 \(MOV\)](#)

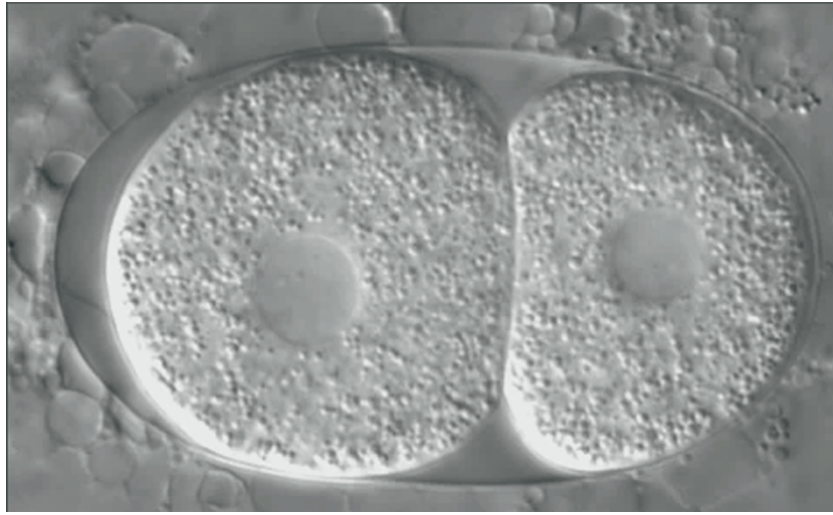

**Movie S2.** This movie corresponds to the experiment shown in Fig. 1B and illustrates the early division up to the four-cell stage of a wild-type *C. elegans* embryo by DIC microscopy (QuickTime, 5.0 MB).

[Movie S2 \(MOV\)](#)

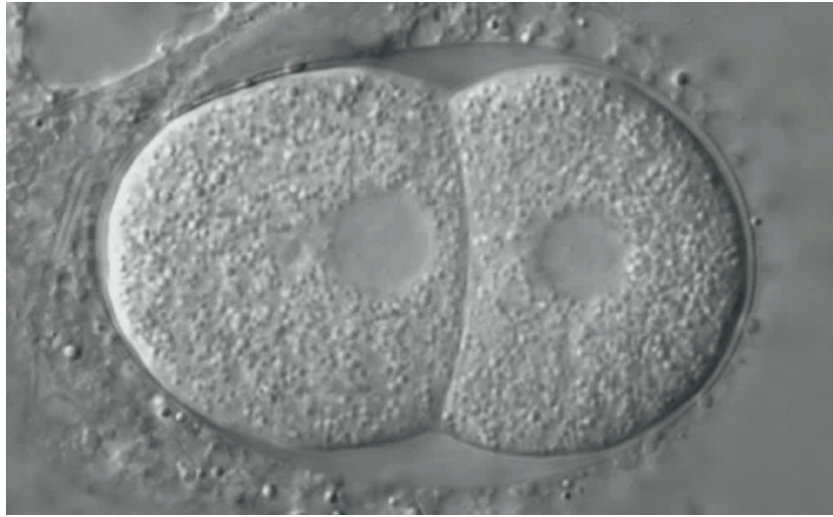

**Movie S3.** This movie corresponds to the experiment shown in Fig. 1B and illustrates by the early division up to the four-cell stage of a *cdc-48(RNAi)* *C. elegans* embryo DIC microscopy. It clearly reveals an abnormal persistent three-cell stage (QuickTime, 6.8 MB).

[Movie S3 \(MOV\)](#)

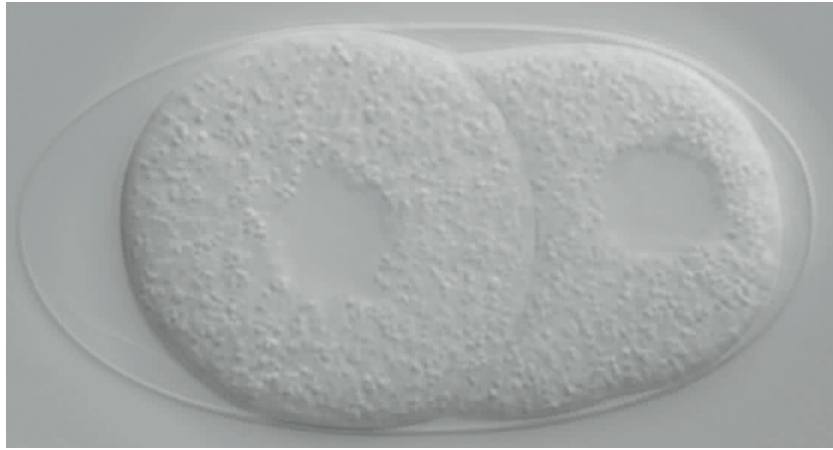

**Movie S4.** This movie corresponds to the experiment shown in Fig. 1B and illustrates the early division up to the four-cell stage of a *ufd-1(RNAi)* *C. elegans* embryo by DIC microscopy. It clearly reveals an abnormal persistent three-cell stage (QuickTime, 3.8 MB).

[Movie S4 \(MOV\)](#)

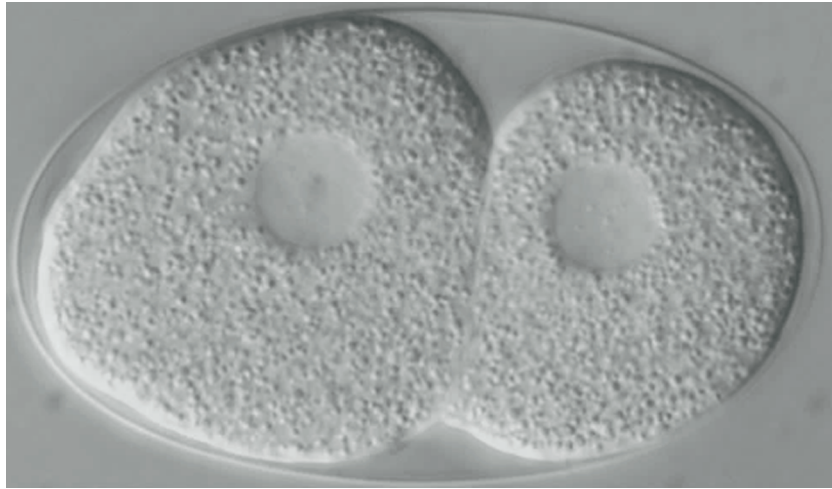

**Movie 55.** This movie corresponds to the experiment shown in Fig. 1B and illustrates the early division up to the four-cell stage of an *npl-4(RNAi)* *C. elegans* embryo by DIC microscopy. It clearly reveals an abnormal persistent three-cell stage (QuickTime, 5.3 MB).

[Movie 55 \(MOV\)](#)

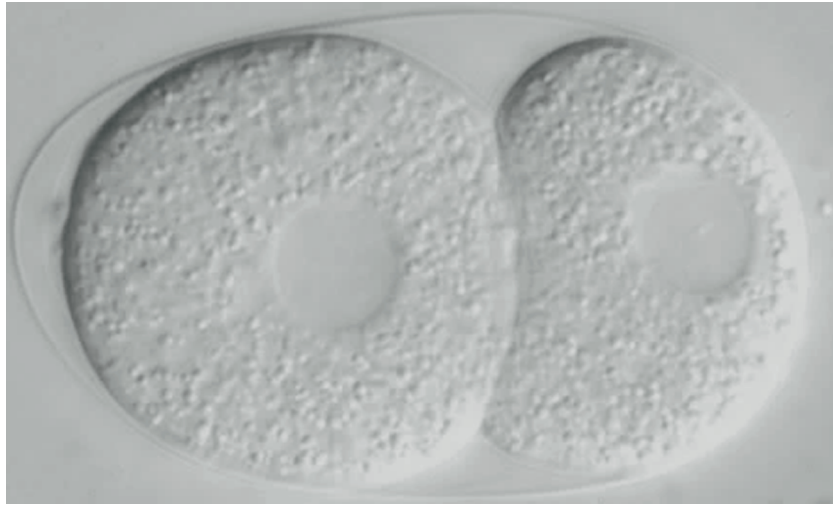

**Movie S6.** This movie corresponds to the experiment shown in Fig. 2A and illustrates the early division up to the four-cell stage of a *cdc-48/atl-1(RNAi)* *C. elegans* embryo by DIC microscopy. It displays that the abnormal persistent P1 cell division delay of *cdc-48(RNAi)* embryos is significantly suppressed (QuickTime, 2.5 MB).

[Movie S6 \(MOV\)](#)

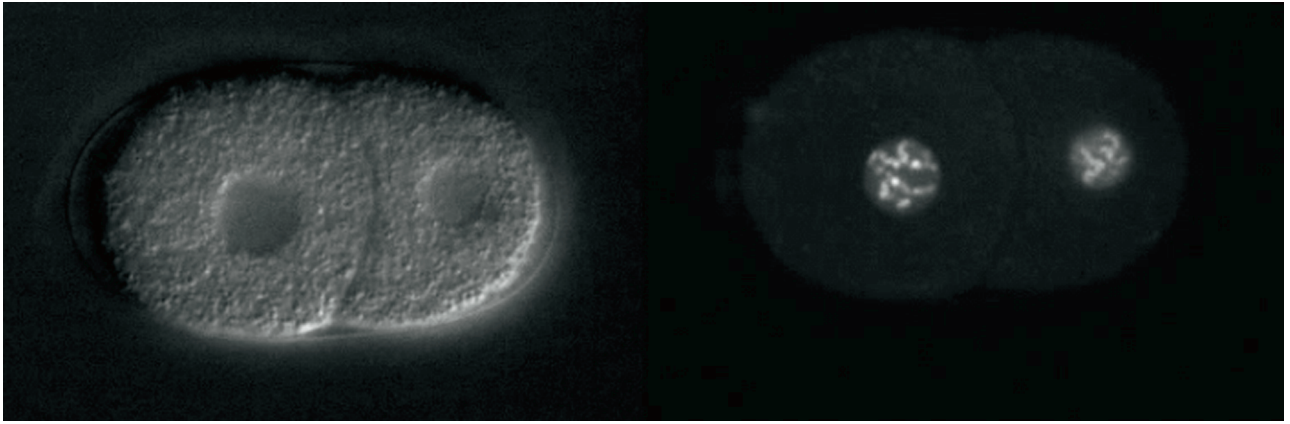

**Movie S7.** This movie corresponds to experiments shown in Fig. 3A and Fig. S5 and illustrates the early division up to the four-cell stage of a wild-type *C. elegans* embryo expressing H2B::GFP by DIC and fluorescence microscopy (QuickTime, 4.1 MB).

[Movie S7 \(MOV\)](#)

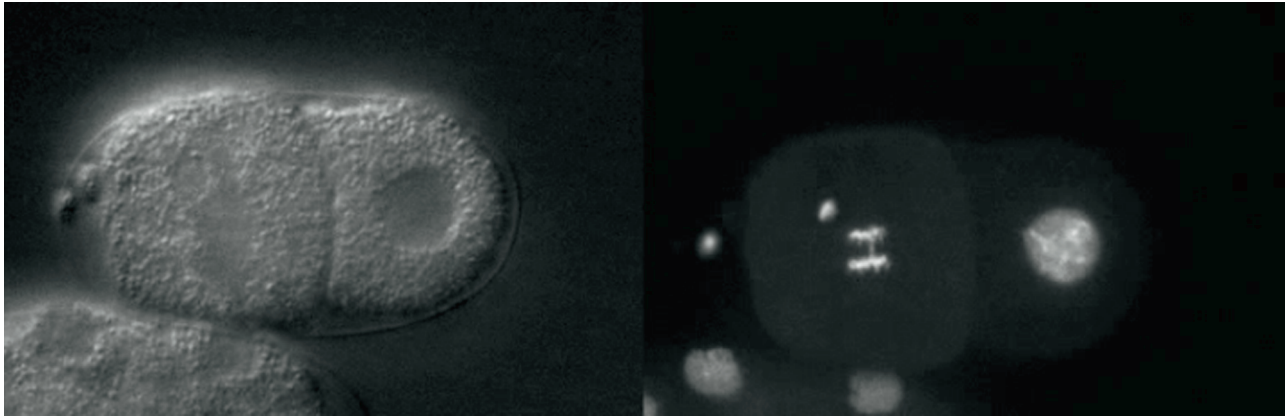

**Movie S8.** This movie corresponds to the experiment shown in Fig. 3A and Fig. S5 and illustrates the early division up to the four-cell stage of a *npl-4(RNAi)* *C. elegans* embryo expressing H2B::GFP by DIC and fluorescence microscopy. It displays chromosome bridges during mitosis as well as a delay in chromatin condensation, especially in the P1 cell (QuickTime, 4.9 MB).

[Movie S8 \(MOV\)](#)



Table S1. Statistical data and analysis

| Fig.                                                        | Genotype                       | n     | Time duration, min:s | SEM, min:s          | t test (P value)    |                     |                     |
|-------------------------------------------------------------|--------------------------------|-------|----------------------|---------------------|---------------------|---------------------|---------------------|
|                                                             |                                |       |                      |                     | WT                  | <i>ufd-1(RNAi)</i>  | <i>npl-4(RNAi)</i>  |
| Duration of the cell division delay between AB and P1 cells |                                |       |                      |                     |                     |                     |                     |
| 1C                                                          | WT                             | 21    | 02:02                | 0:06                | —                   | $1 \times 10^{-16}$ | $6 \times 10^{-11}$ |
|                                                             | <i>ubxn-1(RNAi)</i>            | 8     | 01:56                | 0:10                | $7 \times 10^{-01}$ | $2 \times 10^{-07}$ | n.d.                |
|                                                             | <i>cdc-48(RNAi)</i>            | 13    | 14:32                | 1:08                | $8 \times 10^{-06}$ | $2 \times 10^{-01}$ | $2 \times 10^{-02}$ |
|                                                             | <i>ufd-1(RNAi)</i>             | 35    | 21:27                | 1:14                | $1 \times 10^{-16}$ | —                   | $9 \times 10^{-01}$ |
|                                                             | <i>npl-4(RNAi)</i>             | 19    | 21:52                | 2:17                | $6 \times 10^{-11}$ | $9 \times 10^{-01}$ | —                   |
|                                                             | <i>ufd-1/npl-4(RNAi)</i>       | 13    | 22:50                | 1:06                | $2 \times 10^{-21}$ | $5 \times 10^{-01}$ | $7 \times 10^{-01}$ |
| 1D                                                          | <i>sel-1(RNAi)</i>             | 11    | 02:12                | 0:07                | $3 \times 10^{-01}$ | $3 \times 10^{-08}$ | n.d.                |
|                                                             | <i>ufd-1(RNAi)</i>             | 8     | 21:53                | 2:16                | $1 \times 10^{-14}$ | —                   | n.d.                |
|                                                             | <i>ire-1(RNAi)</i>             | 10    | 02:08                | 0:04                | $4 \times 10^{-01}$ | $9 \times 10^{-08}$ | n.d.                |
|                                                             | <i>ufd-1/ire-1(RNAi)</i>       | 11    | 22:46                | 1:25                | $8 \times 10^{-20}$ | $7 \times 10^{-01}$ | n.d.                |
| 4E                                                          | WT                             | 7     | 01:52                | 0:06                | —                   | $3 \times 10^{-09}$ | n.d.                |
|                                                             | <i>ufd-1(RNAi)</i>             | 7     | 16:41                | 0:53                | $3 \times 10^{-09}$ | —                   | n.d.                |
|                                                             | <i>cdt-1(RNAi)</i>             | 12    | 03:00                | 0:11                | $4 \times 10^{-04}$ | $2 \times 10^{-12}$ | n.d.                |
|                                                             | <i>cdc-6(RNAi)</i>             | 16    | 06:04                | 0:15                | $5 \times 10^{-10}$ | $2 \times 10^{-12}$ | n.d.                |
| Duration from pronuclei meeting to NEBD in P0 cell          |                                |       |                      |                     |                     |                     |                     |
| 2C                                                          | WT                             | 9     | 05:18                | 0:15                | —                   | $4 \times 10^{-01}$ | $3 \times 10^{-04}$ |
|                                                             | <i>cdc-48(RNAi)</i>            | 6     | 05:53                | 0:54                | $5 \times 10^{-01}$ | $6 \times 10^{-14}$ | $6 \times 10^{-02}$ |
|                                                             | <i>ufd-1(RNAi)</i>             | 6     | 08:25                | 0:38                | $4 \times 10^{-04}$ | —                   | $1 \times 10^{-00}$ |
|                                                             | <i>npl-4(RNAi)</i>             | 6     | 08:22                | 0:36                | $3 \times 10^{-04}$ | $1 \times 10^{-20}$ | —                   |
|                                                             | <i>cdc-48/atl-1(RNAi)</i>      | 2     | 03:49                | 0:18                | $4 \times 10^{-02}$ | $1 \times 10^{-01}$ | $9 \times 10^{-03}$ |
|                                                             | <i>ufd-1/atl-1(RNAi)</i>       | 10    | 03:43                | 0:07                | $3 \times 10^{-05}$ | $6 \times 10^{-14}$ | n.d.                |
|                                                             | <i>npl-4/atl-1(RNAi)</i>       | 5     | 03:43                | 0:18                | $2 \times 10^{-03}$ | n.d.                | $7 \times 10^{-05}$ |
|                                                             | <i>ufd-1/chk-1(RNAi)</i>       | 6     | 04:27                | 0:10                | $3 \times 10^{-02}$ | $1 \times 10^{-01}$ | n.d.                |
|                                                             | <i>npl-4/chk-1(RNAi)</i>       | 8     | 05:15                | 0:23                | $9 \times 10^{-01}$ | n.d.                | $1 \times 10^{-03}$ |
|                                                             | <i>ufd-1/atl-1/chk-1(RNAi)</i> | 2     | 04:26                | 0:05                | $2 \times 10^{-01}$ | $2 \times 10^{-01}$ | n.d.                |
|                                                             | <i>npl-4/atl-1/chk-1(RNAi)</i> | 5     | 04:37                | 0:38                | $3 \times 10^{-01}$ | n.d.                | $4 \times 10^{-03}$ |
| S3                                                          | WT (as in Fig. 2C)             | —     | —                    | —                   | n.d.                | n.d.                | n.d.                |
|                                                             | <i>atm-1(RNAi)</i>             | 11    | 04:10                | 0:05                | $4 \times 10^{-04}$ | $4 \times 10^{-06}$ | n.d.                |
|                                                             | <i>ufd-1(RNAi)</i>             | 10    | 08:14                | 0:37                | $1 \times 10^{-03}$ | —                   | n.d.                |
|                                                             | <i>ufd-1/atm-1(RNAi)</i>       | 9     | 07:37                | 0:36                | $4 \times 10^{-03}$ | $5 \times 10^{-01}$ | n.d.                |
| Duration of the interphase in AB cell                       |                                |       |                      |                     |                     |                     |                     |
| 2C                                                          | WT                             | 23    | 10:08                | 0:15                | —                   | $7 \times 10^{-06}$ | $5 \times 10^{-09}$ |
|                                                             | <i>cdc-48(RNAi)</i>            | 9     | 11:49                | 0:33                | $4 \times 10^{-03}$ | $4 \times 10^{-01}$ | $1 \times 10^{-02}$ |
|                                                             | <i>ufd-1(RNAi)</i>             | 22    | 12:26                | 0:22                | $7 \times 10^{-06}$ | —                   | $1 \times 10^{-02}$ |
|                                                             | <i>npl-4(RNAi)</i>             | 17    | 14:05                | 0:29                | $5 \times 10^{-09}$ | $1 \times 10^{-02}$ | —                   |
|                                                             | <i>cdc-48/atl-1(RNAi)</i>      | 3     | 09:43                | 0:23                | $6 \times 10^{-01}$ | $2 \times 10^{-02}$ | $2 \times 10^{-03}$ |
|                                                             | <i>ufd-1/atl-1(RNAi)</i>       | 13    | 11:09                | 0:33                | $7 \times 10^{-02}$ | $6 \times 10^{-02}$ | n.d.                |
|                                                             | <i>npl-4/atl-1(RNAi)</i>       | 9     | 11:51                | 0:22                | $1 \times 10^{-03}$ | n.d.                | $6 \times 10^{-03}$ |
|                                                             | <i>ufd-1/chk-1(RNAi)</i>       | 12    | 11:23                | 0:10                | $3 \times 10^{-03}$ | $5 \times 10^{-02}$ | n.d.                |
|                                                             | <i>npl-4/chk-1(RNAi)</i>       | 9     | 11:13                | 0:22                | $3 \times 10^{-02}$ | n.d.                | $8 \times 10^{-04}$ |
|                                                             | <i>ufd-1/atl-1/chk-1(RNAi)</i> | 10    | 11:20                | 0:10                | $7 \times 10^{-02}$ | $6 \times 10^{-02}$ | n.d.                |
| <i>npl-4/atl-1/chk-1(RNAi)</i>                              | 8                              | 12:16 | 0:21                 | $2 \times 10^{-04}$ | n.d.                | $3 \times 10^{-02}$ |                     |
| S2B                                                         | WT                             | 29    | 09:59                | 0:19                | —                   | $1 \times 10^{-02}$ | n.d.                |
|                                                             | <i>mdf-1(RNAi)</i>             | 3     | 10:04                | 0:22                | $9 \times 10^{-01}$ | $1 \times 10^{-04}$ | n.d.                |
|                                                             | <i>ufd-1(RNAi)</i>             | 3     | 12:01                | 0:07                | $1 \times 10^{-02}$ | —                   | n.d.                |
|                                                             | <i>ufd-1/mdf-1(RNAi)</i>       | 11    | 11:27                | 0:14                | $2 \times 10^{-03}$ | $6 \times 10^{-01}$ | n.d.                |
| S3                                                          | WT (as in Fig. 2C)             | —     | —                    | —                   | n.d.                | n.d.                | n.d.                |
|                                                             | <i>atm-1(RNAi)</i>             | 11    | 09:32                | 0:18                | $2 \times 10^{-01}$ | $2 \times 10^{-02}$ | n.d.                |
|                                                             | <i>ufd-1(RNAi)</i>             | 10    | 12:51                | 0:35                | $3 \times 10^{-05}$ | —                   | n.d.                |
|                                                             | <i>ufd-1/atm-1(RNAi)</i>       | 13    | 12:26                | 0:26                | $4 \times 10^{-05}$ | $5 \times 10^{-02}$ | n.d.                |

| Fig.                                                          | Genotype                       | n     | Time duration, min:s | SEM, min:s          | t test (P value)    |                     |                     |
|---------------------------------------------------------------|--------------------------------|-------|----------------------|---------------------|---------------------|---------------------|---------------------|
|                                                               |                                |       |                      |                     | WT                  | <i>ufd-1(RNAi)</i>  | <i>npl-4(RNAi)</i>  |
| Duration of the interphase in P1 cell                         |                                |       |                      |                     |                     |                     |                     |
| 2C                                                            | WT                             | 23    | 12:15                | 0:17                | —                   | $8 \times 10^{-18}$ | $3 \times 10^{-12}$ |
|                                                               | <i>cdc-48(RNAi)</i>            | 9     | 26:56                | 1:54                | $3 \times 10^{-12}$ | $4 \times 10^{-01}$ | $5 \times 10^{-03}$ |
|                                                               | <i>ufd-1(RNAi)</i>             | 22    | 28:52                | 1:08                | $8 \times 10^{-18}$ | —                   | $6 \times 10^{-03}$ |
|                                                               | <i>npl-4(RNAi)</i>             | 17    | 34:01                | 1:14                | $3 \times 10^{-12}$ | $6 \times 10^{-03}$ | —                   |
|                                                               | <i>cdc-48/atl-1(RNAi)</i>      | 3     | 13:13                | 1:10                | $3 \times 10^{-01}$ | $7 \times 10^{-05}$ | $5 \times 10^{-06}$ |
|                                                               | <i>ufd-1/atl-1(RNAi)</i>       | 13    | 18:04                | 0:54                | $2 \times 10^{-08}$ | $3 \times 10^{-07}$ | n.d.                |
|                                                               | <i>npl-4/atl-1(RNAi)</i>       | 9     | 19:15                | 0:49                | $6 \times 10^{-11}$ | n.d.                | $6 \times 10^{-08}$ |
|                                                               | <i>ufd-1/chk-1(RNAi)</i>       | 12    | 17:41                | 0:12                | $4 \times 10^{-14}$ | $6 \times 10^{-08}$ | n.d.                |
|                                                               | <i>npl-4/chk-1(RNAi)</i>       | 9     | 18:22                | 0:34                | $3 \times 10^{-11}$ | n.d.                | $1 \times 10^{-08}$ |
|                                                               | <i>ufd-1/atl-1/chk-1(RNAi)</i> | 10    | 15:51                | 0:28                | $2 \times 10^{-07}$ | $3 \times 10^{-08}$ | n.d.                |
| <i>npl-4/atl-1/chk-1(RNAi)</i>                                | 8                              | 19:08 | 0:35                 | $5 \times 10^{-12}$ | n.d.                | $1 \times 10^{-07}$ |                     |
| 3D                                                            | WT                             | 29    | 12:09                | 0:15                | —                   | $2 \times 10^{-08}$ | $8 \times 10^{-21}$ |
|                                                               | <i>div-1(RNAi)</i>             | 14    | 17:11                | 0:09                | $4 \times 10^{-16}$ | $2 \times 10^{-13}$ | $5 \times 10^{-10}$ |
|                                                               | <i>ufd-1(RNAi)</i>             | 39    | 30:48                | 0:48                | $2 \times 10^{-28}$ | —                   | $1 \times 10^{-00}$ |
|                                                               | <i>npl-4(RNAi)</i>             | 12    | 30:52                | 1:25                | $8 \times 10^{-21}$ | $1 \times 10^{-00}$ | —                   |
|                                                               | <i>ufd-1/div-1(RNAi)</i>       | 13    | 32:45                | 1:11                | $2 \times 10^{-24}$ | $2 \times 10^{-01}$ | n.d.                |
|                                                               | <i>npl-4/div-1(RNAi)</i>       | 12    | 35:53                | 1:07                | $6 \times 10^{-27}$ | n.d.                | $2 \times 10^{-02}$ |
| S2B                                                           | WT (as in Fig. 3D)             | —     | —                    | —                   | n.d.                | n.d.                | n.d.                |
|                                                               | <i>mdf-1(RNAi)</i>             | 3     | 12:20                | 0:05                | $8 \times 10^{-01}$ | $2 \times 10^{-03}$ | n.d.                |
|                                                               | <i>ufd-1(RNAi)</i>             | 3     | 26:45                | 1:28                | $3 \times 10^{-15}$ | —                   | n.d.                |
|                                                               | <i>ufd-1/mdf-1(RNAi)</i>       | 11    | 26:01                | 1:32                | $1 \times 10^{-15}$ | $8 \times 10^{-01}$ | n.d.                |
| S3                                                            | WT (as in Fig. 2C)             | —     | —                    | —                   | n.d.                | n.d.                | n.d.                |
|                                                               | <i>atm-1(RNAi)</i>             | 11    | 11:41                | 0:24                | $3 \times 10^{-01}$ | $1 \times 10^{-09}$ | n.d.                |
|                                                               | <i>ufd-1(RNAi)</i>             | 10    | 33:07                | 1:55                | $7 \times 10^{-16}$ | —                   | n.d.                |
|                                                               | <i>ufd-1/atm-1(RNAi)</i>       | 13    | 31:22                | 2:11                | $9 \times 10^{-13}$ | $6 \times 10^{-01}$ | n.d.                |
| Duration of the mitosis in P0 cell                            |                                |       |                      |                     |                     |                     |                     |
| S2A                                                           | WT                             | 22    | 05:31                | 0:09                | —                   | $3 \times 10^{-02}$ | $2 \times 10^{-01}$ |
|                                                               | <i>cdc-48(RNAi)</i>            | 9     | 04:17                | 0:16                | $9 \times 10^{-04}$ | $7 \times 10^{-02}$ | $8 \times 10^{-02}$ |
|                                                               | <i>ufd-1(RNAi)</i>             | 20    | 05:01                | 0:09                | $3 \times 10^{-02}$ | —                   | $6 \times 10^{-01}$ |
|                                                               | <i>npl-4(RNAi)</i>             | 14    | 05:10                | 0:07                | $2 \times 10^{-01}$ | $6 \times 10^{-01}$ | —                   |
| Duration of the mitosis in AB cell                            |                                |       |                      |                     |                     |                     |                     |
| S2A                                                           | WT                             | 23    | 04:21                | 0:08                | —                   | $2 \times 10^{-02}$ | $1 \times 10^{-02}$ |
|                                                               | <i>cdc-48(RNAi)</i>            | 13    | 04:49                | 0:14                | $8 \times 10^{-02}$ | $8 \times 10^{-01}$ | $1 \times 10^{-00}$ |
|                                                               | <i>ufd-1(RNAi)</i>             | 28    | 04:53                | 0:09                | $2 \times 10^{-02}$ | —                   | $7 \times 10^{-01}$ |
|                                                               | <i>npl-4(RNAi)</i>             | 23    | 04:46                | 0:07                | $1 \times 10^{-02}$ | $7 \times 10^{-01}$ | —                   |
| Duration of the mitosis in P1 cell                            |                                |       |                      |                     |                     |                     |                     |
| S2A                                                           | WT                             | 23    | 04:08                | 0:09                | —                   | $7 \times 10^{-02}$ | $9 \times 10^{-03}$ |
|                                                               | <i>cdc-48(RNAi)</i>            | 13    | 04:13                | 0:14                | $8 \times 10^{-01}$ | $2 \times 10^{-01}$ | $7 \times 10^{-02}$ |
|                                                               | <i>ufd-1(RNAi)</i>             | 27    | 04:50                | 0:09                | $7 \times 10^{-02}$ | —                   | $7 \times 10^{-01}$ |
|                                                               | <i>npl-4(RNAi)</i>             | 24    | 05:01                | 0:07                | $9 \times 10^{-03}$ | $7 \times 10^{-01}$ | —                   |
| Duration from the male pronucleus movement to NEBD in P0 cell |                                |       |                      |                     |                     |                     |                     |
| S2C                                                           | WT                             | 7     | 05:30                | 0:15                | —                   | $1 \times 10^{-02}$ | $6 \times 10^{-03}$ |
|                                                               | <i>air-2(RNAi)</i>             | 10    | 05:26                | 0:13                | $9 \times 10^{-01}$ | $3 \times 10^{-03}$ | $1 \times 10^{-03}$ |
|                                                               | <i>ufd-1(RNAi)</i>             | 4     | 08:48                | 1:12                | $1 \times 10^{-02}$ | —                   | $7 \times 10^{-01}$ |
|                                                               | <i>npl-4(RNAi)</i>             | 5     | 08:14                | 0:46                | $6 \times 10^{-03}$ | $7 \times 10^{-01}$ | —                   |
|                                                               | <i>ufd-1/air-2(RNAi)</i>       | 11    | 08:19                | 0:34                | $3 \times 10^{-03}$ | $7 \times 10^{-01}$ | n.d.                |
|                                                               | <i>npl-4/air-2(RNAi)</i>       | 10    | 08:54                | 0:11                | $5 \times 10^{-04}$ | n.d.                | $5 \times 10^{-01}$ |

Two-tailed Student's *t* test was used to generate p-values compared to wild-type (WT), *ufd-1(RNAi)*, and *npl-4(RNAi)*. Non determined values are indicated by n.d. *n* represents the number of scored embryos, time durations and SEM are expressed in min:s.

**Table S2. Knockdown of *atl-1* and *chk-1* does not suppress chromosome bridges caused by *ufd-1(RNAi)***

| Genotype                                                                        | <i>n</i> | Percentage values |
|---------------------------------------------------------------------------------|----------|-------------------|
| Proportion of two-, three-, and four-cell stage embryos with chromosome bridges |          |                   |
| WT                                                                              | 15       | 0                 |
| <i>ufd-1(RNAi)</i>                                                              | 37       | 43                |
| <i>npl-4(RNAi)</i>                                                              | 50       | 68                |
| Proportion of nuclei with chromosome bridges in early embryos                   |          |                   |
| WT                                                                              | 97       | 0                 |
| <i>ufd-1(RNAi)</i>                                                              | 98       | 12                |
| <i>ufd-1/atl-1/chk-1(RNAi)</i>                                                  | 98       | 19                |

Shown is quantification of DAPI stained nuclei with chromosome bridges by confocal microscopy.

**Table S3. Values and statistical analysis of replication assay shown in Fig. 4B**

| Nuclei per one-celled embryo | Control      | <i>cdc-48</i> (RNAi) | <i>ufd-1</i> (RNAi) | <i>npl-4</i> (RNAi) | + HU 20 mM   | <i>mus-101</i> (RNAi) | <i>atl-1/chk-1</i> (RNAi) |
|------------------------------|--------------|----------------------|---------------------|---------------------|--------------|-----------------------|---------------------------|
| 3                            | 0.19         | 0.50                 | 0.46                | 0.42                | 0.40         | 0.46                  | 0.51                      |
| 4                            | 0.16         | 0.34                 | 0.18                | 0.35                | 0.27         | 0.18                  | 0.31                      |
| 5                            | 0.09         | 0.10                 | 0.16                | 0.13                | 0.12         | 0.16                  | 0.11                      |
| 6                            | 0.10         | 0.06                 | 0.16                | 0.03                | 0.09         | 0.16                  | 0.04                      |
| 7                            | 0.15         | —                    | 0.04                | 0.03                | 0.03         | 0.04                  | 0.02                      |
| 8                            | 0.10         | —                    | —                   | —                   | 0.08         | —                     | —                         |
| 9                            | 0.06         | —                    | —                   | —                   | —            | —                     | —                         |
| 10                           | 0.03         | —                    | —                   | 0.03                | 0.01         | —                     | —                         |
| 12                           | 0.03         | —                    | —                   | —                   | —            | —                     | —                         |
| 13                           | 0.01         | —                    | —                   | —                   | —            | —                     | —                         |
| 14                           | 0.03         | —                    | —                   | —                   | —            | —                     | —                         |
| 15                           | 0.01         | —                    | —                   | —                   | —            | —                     | —                         |
| 16                           | 0.01         | —                    | —                   | —                   | —            | —                     | —                         |
| 17                           | —            | —                    | —                   | —                   | —            | —                     | —                         |
| 18                           | 0.02         | —                    | —                   | —                   | —            | —                     | —                         |
| 21                           | 0.01         | —                    | —                   | —                   | —            | —                     | —                         |
| Mean                         | 6.67         | 3.72                 | 4.13                | 4.06                | 4.39         | 4.30                  | 3.76                      |
| SD                           | 3.67         | 0.88                 | 1.27                | 1.48                | 1.67         | 1.51                  | 0.98                      |
| SEM                          | 0.36         | 0.12                 | 0.17                | 0.27                | 0.19         | 0.28                  | 0.15                      |
| <i>n</i>                     | 106          | 50                   | 56                  | 31                  | 75           | 30                    | 45                        |
| 99% CI                       | 5.73 to 7.61 | 3.39 to 4.05         | 3.67 to 4.58        | 3.33 to 4.80        | 3.88 to 4.90 | 3.54 to 5.06          | 3.36 to 4.15              |
| Min.                         | 3            | 3                    | 3                   | 3                   | 3            | 3                     | 3                         |
| Median                       | 6            | 3.5                  | 4                   | 4                   | 4            | 4                     | 3                         |
| Max.                         | 21           | 6                    | 7                   | 10                  | 10           | 8                     | 7                         |

Shown is the distribution of embryos determined from the number of nuclei per one-celled embryo after cytochalasin B treatment. Mean, standard deviation (SD), standard error of the mean (SEM), number of embryos (*n*), confidence interval (CI) at 99%, minimal value (Min.), median value, and maximal value (Max.) as indicated.
